# Supplementary material for: Status epilepticus in POLG disease: a large multinational study
Source: PubMed Central journal article supplement (PMC11319559; doi:10.1007/s00415-024-12463-5), 2024-06-01
Supplement: 415_2024_12463_MOESM1_ESM.pdf [file 415_2024_12463_MOESM1_ESM.pdf]

## Status epilepticus in POLG disease: a large multinational study

*Journal of Neurology*

Supplementary table 1: Brain MRI findings in patients with POLG disease and status epilepticus

| Cerebral MRI findings        | No. (%)     |
|------------------------------|-------------|
| Cortical focal lesions       | 55/77 (67%) |
| Generalized cerebral atrophy | 10/30 (33%) |
| Putamen lesions              | 1/73 (1%)   |
| Caudate nucleus lesions      | 4/72 (5%)   |
| Thalamus lesions             | 36/77 (47%) |
| Pons lesions                 | 4/73 (5%)   |
| White matter lesions         | 5/72 (7%)   |
| Vermis lesions               | 4/72 (5%)   |
| Dentate nucleus lesions      | 3/72 (4%)   |

Supplementary table 2: Number of patients with POLG and status epilepticus according to age of SE onset and genetic findings (compound heterozygous versus homozygous for *POLG* variants)

| Age categories at SE onset | Compound heterozygous <i>POLG</i> variants | Homozygous <i>POLG</i> variants |
|----------------------------|--------------------------------------------|---------------------------------|
| < 12 years                 | 39/49 (80%)                                | 10/49 (20%)                     |
| 12-40 years                | 7/32 (22%)                                 | 25/32 (78%)                     |
| > 40 years                 | 0 (0%)                                     | 6/6 (100%)                      |

Supplementary table 3: Number of patients with POLG disease and status epilepticus at disease onset or later according to genetic findings (compound heterozygous versus homozygous for *POLG* variants)

| Onset of status epilepticus | Compound heterozygous <i>POLG</i> variants | Homozygous <i>POLG</i> variants |
|-----------------------------|--------------------------------------------|---------------------------------|
| At disease onset            | 24/40 (60%)                                | 16/40 (40%)                     |
| Later during disease course | 25/53 (47%)                                | 28/53 (53%)                     |
| Total                       | 49                                         | 44                              |

Supplementary table 4: Median time to death according to the stage of status epilepticus and medications which were administrated.

| SE stages           | Status epilepticus management categories                                          | Median time to death (minimum/maximum) |
|---------------------|-----------------------------------------------------------------------------------|----------------------------------------|
| Established SE      | Phenytoin, Fosphenytoin, Levetiracetam, Valproate, Phenobarbital, Midazola        | 6 months (34days to 35 years)          |
| Refractory SE       | Midazolam, Thiopental, Propofol, clonazepam                                       | 5 months (42 days to 19 months)        |
| Super-refractory SE | Isoflurane gas, Prednisolone, ACTH, Immunoglobulin, Tacrolimus, Suxamethonium, KD | 4 months (14 days to 9 months)         |

Supplementary Figure 1. Kaplan Meier curve comparing survival in those with and those without seizures.

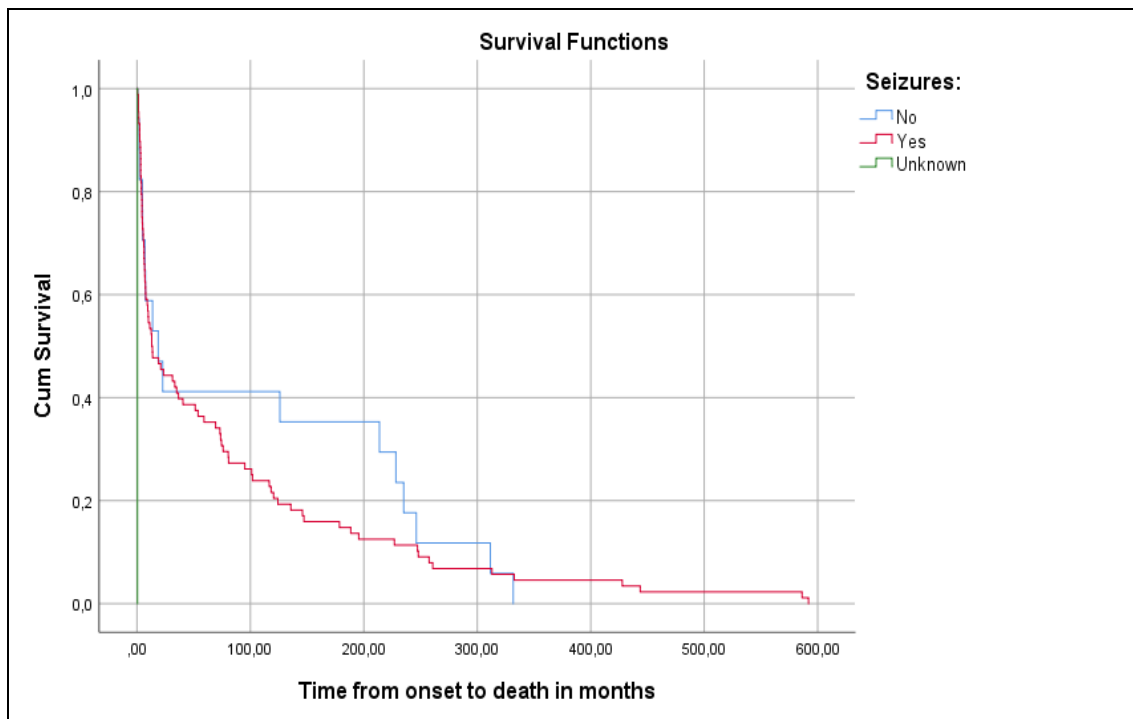

The presence of seizures was associated with a significantly worse survival ( $P < 0.001$ )
